# Supplementary material
Source: MDPI journal article supplement (https://www.mdpi.com/2227-9717/8/6/655)
Supplement: s1 [file s1]

# Supplementary Materials: Optimization of Synthesizing Upright ZnO Rod Arrays with Large Diameters through Response Surface Methodology

Xiaofei Sheng <sup>1,2</sup>, Yajuan Cheng <sup>3,\*</sup>, Yingming Yao<sup>3,\*</sup> and Zhe Zhao <sup>4,5,\*</sup>

## 1. Supplementary Information

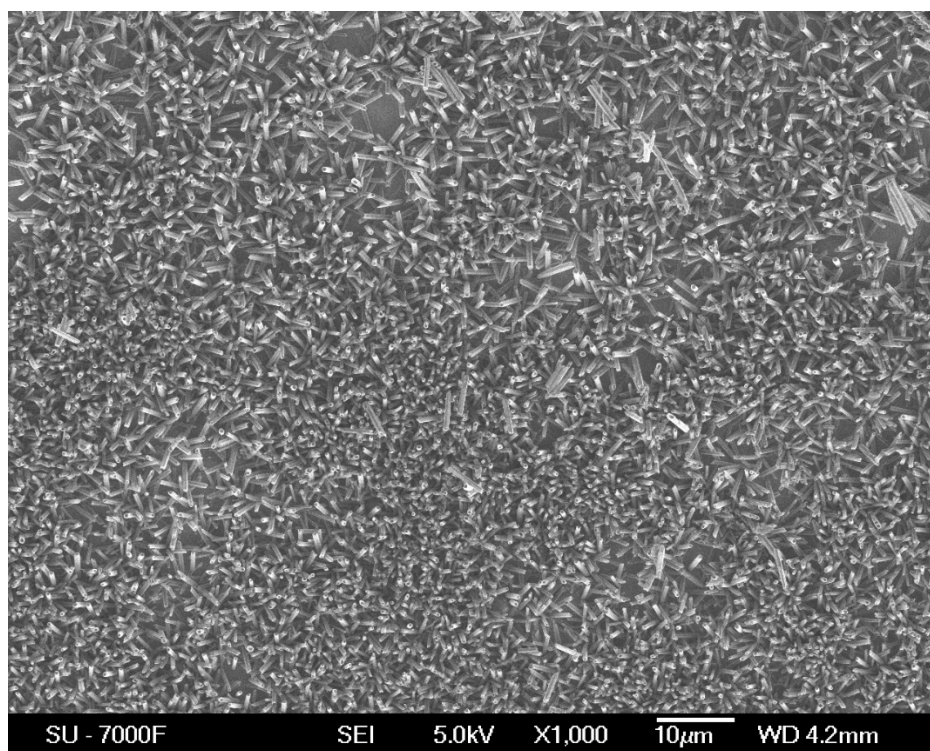

**Figure S1** The SEM image of obtained ZnO rods in the edge of the samples.

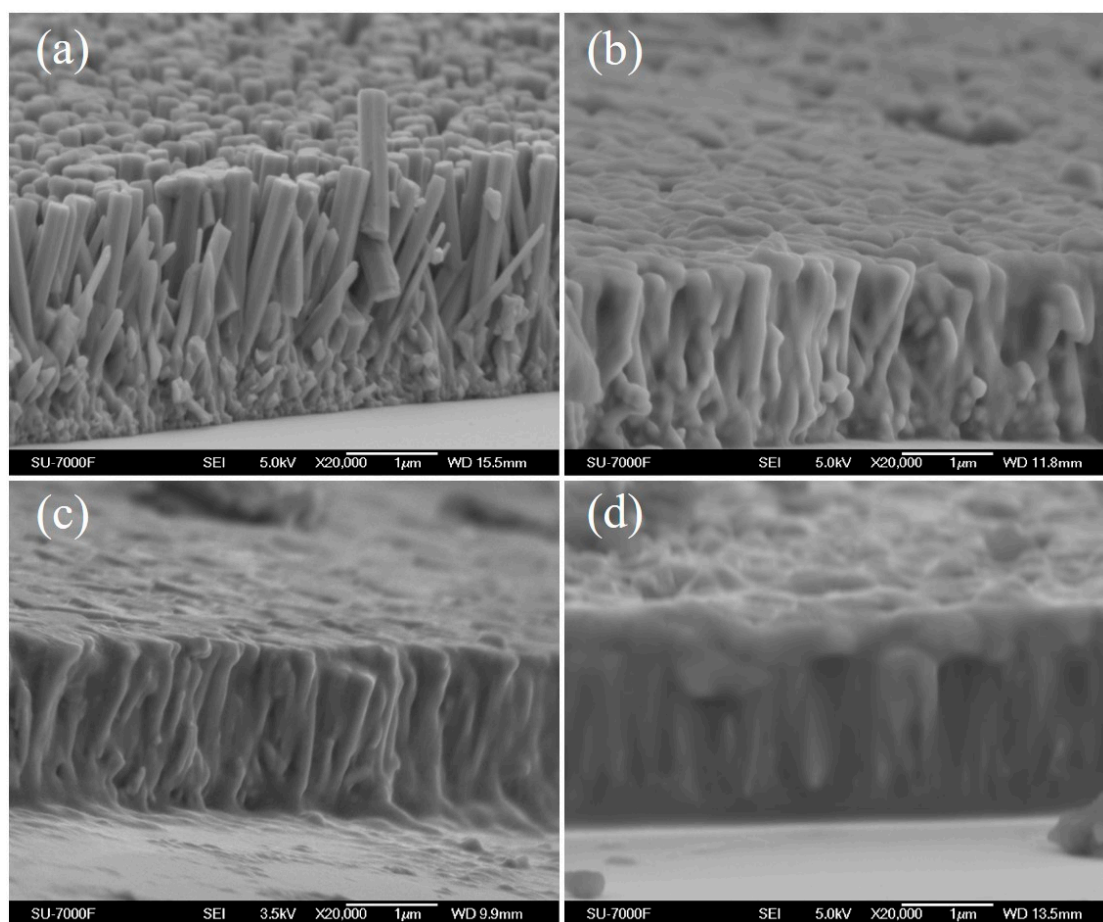

**Figure S2.** The enlarged cross-sectional images of the obtained ZnO rod arrays, corresponding to Fig. 8 in the manuscript.
